# Supplementary material
Source: HighWire-hosted journal article supplement (https://jnis.bmj.com/highwire/filestream/169497/field_highwire_adjunct_files/0/neurintsurg-2021-017809supp001_data_supplement.pdf)
Supplement: neurintsurg-2021-017809supp001_data_supplement.pdf [file neurintsurg-2021-017809supp001_data_supplement.pdf]

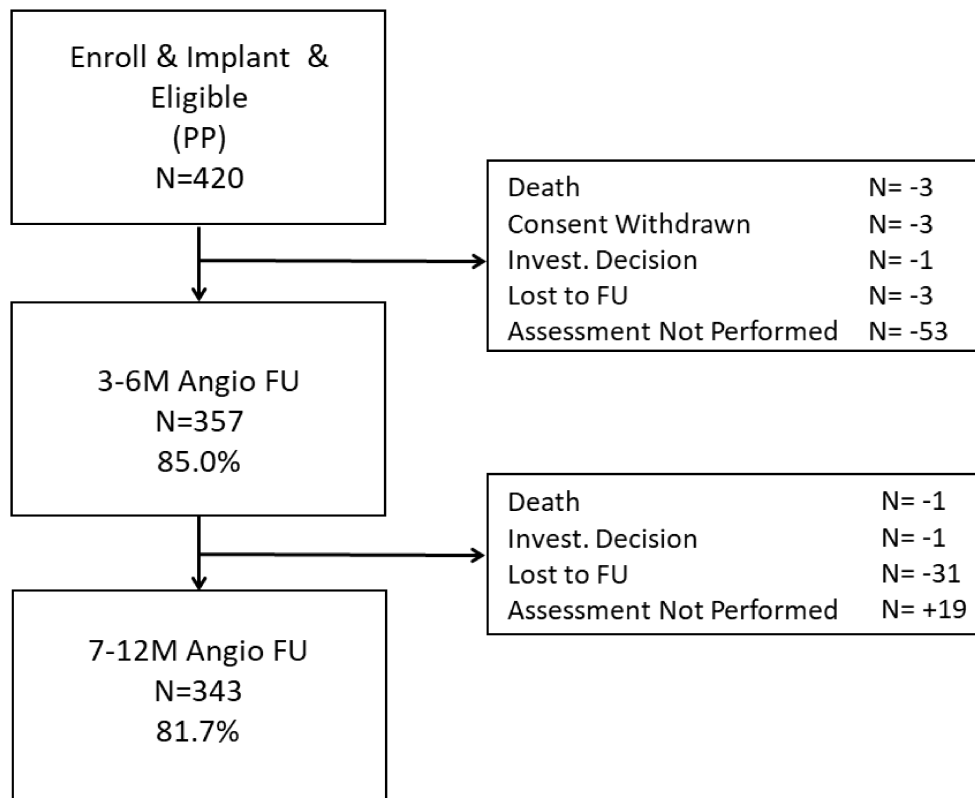

Supplemental Figure 1: Flow-chart of angiographic data

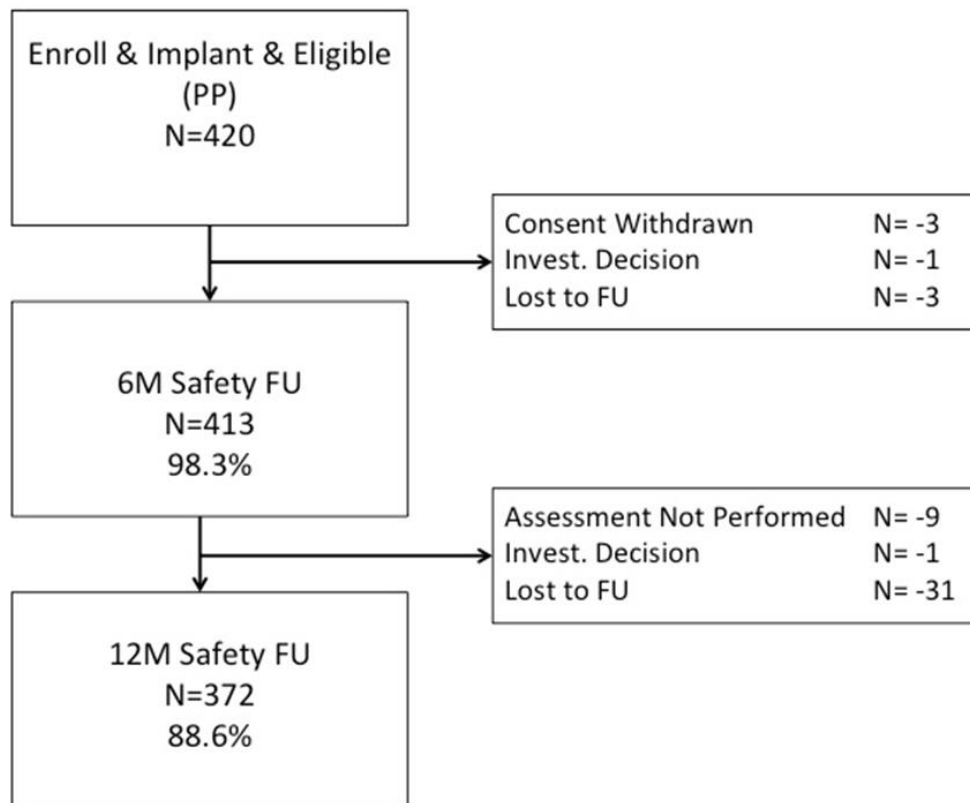

*Supplemental Figure 2: Flow-chart for Safety Endpoint*

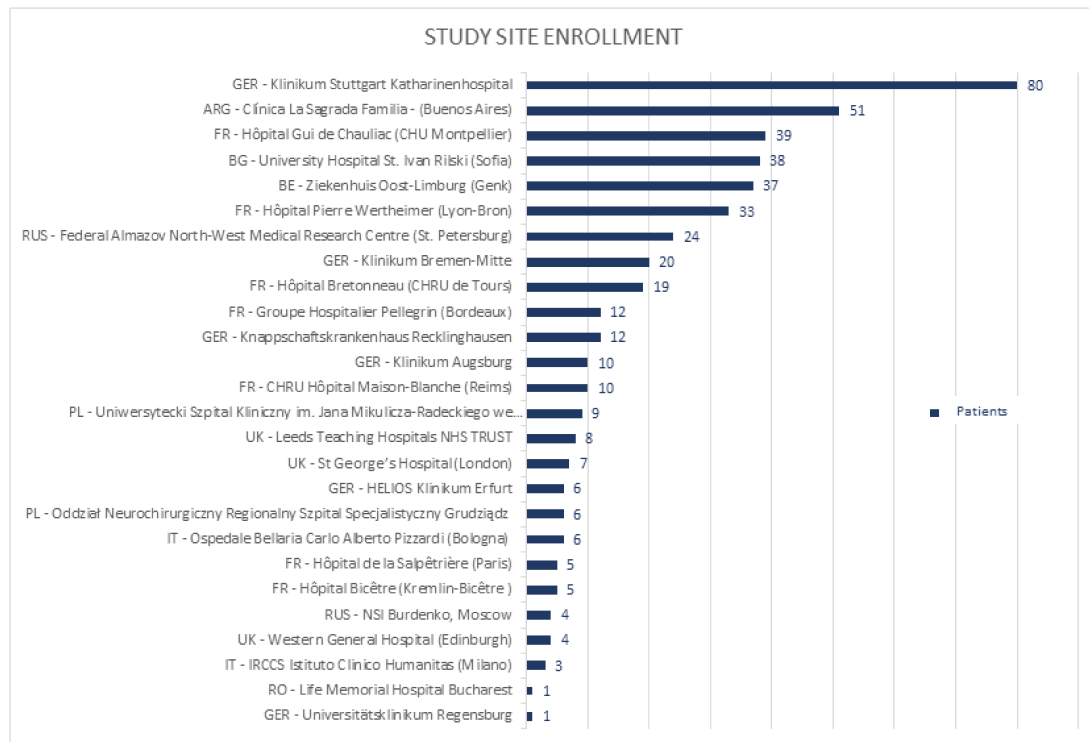

*Supplemental Figure 3: Study site enrollment*

*Supplemental Table 1: Number of p64 Flow Modulation Devices implanted and use of adjunctive coiling.*

| Procedural Data                                       | Number  | Percentage |
|-------------------------------------------------------|---------|------------|
| p64 deployed at the desired location                  | 412/420 | 98.10%     |
| Correct opening of p64 at the end of the intervention | 409/420 | 97.40%     |
| Number of implanted p64s per subject                  | n=420   |            |
| 1                                                     | 405     | 96.40%     |
| 2                                                     | 12      | 2.90%      |
| 3                                                     | 2       | 0.50%      |
| 10                                                    | 1       | 0.20%      |
| Adjunctively coiling                                  |         |            |
| No                                                    | 361     | 86.00%     |
| Yes                                                   | 59      | 14.00%     |

## **Eligibility Criteria**

### ***Inclusion Criteria***

1. Age  $\geq 18$
2. Patient harbors either one saccular or one dissecting or one blister-like or one fusiform IA or one intracranial segmental disease, in the anterior circulation for which the indication for p64 treatment is given
3. Patient or legal representative provides written informed consent verifying that he/she consents to the use of his/ her data (according to the data protection laws) and in accordance with EN ISO 14155:2012-01

### ***Exclusion Criteria***

1. IAs of the posterior circulation
2. Imaging evidence of bifurcation IA
3. Imaging evidence of dissections
4. Imaging evidence of arteriovenous fistula
5. Imaging evidence of arteriovenous malformation
6. Patient is harboring another IA that has to be treated within six months after first procedure
7. Known allergy to study medication (e.g., ASA, Clopidogrel, Heparin or contrast media)
8. Confirmation of positive pregnancy test according to site specific standard of care (e.g. test, verbal communication)
9. Current involvement in another study or trial
10. Parent vessel treated with other Flow Diverters than p64 during intervention and retreatment
